# Supplementary material for: A steam-mediated isothermal amplification and flocculation-based detection platform for electricity-free point of care diagnostics
Source: Royal Society of Chemistry journal article supplement (doi:10.1039/d4an01526f), 2025-01-01
Supplement: d4an01526f1.pdf [file d4an01526f1.pdf]

**Steam-mediated Isothermal Amplification and Flocculation-based Detection Platform  
for Electricity-Free Nucleic Acid Detection at the Point-of-Care**

Kissan D. Achary <sup>†a</sup>, Satheesh Natarajan<sup>†b</sup>, and Aashish Priye<sup>b,c\*</sup>

<sup>†</sup> Equal contributions

**Affiliations**

<sup>a</sup> Department of Chemical and Environmental Engineering, University of Cincinnati, Cincinnati, OH 45221, USA

<sup>b</sup> Healthcare Technology Innovation Center, Indian Institute of Technology, Madras, Chennai, India

<sup>c</sup> Digital Futures, University of Cincinnati, OH 45221, USA

\*Correspondence:

Prof. Aashish Priye

Department of Chemical and Environmental Engineering

University of Cincinnati

Cincinnati, OH, 45221, USA

Phone: +1-979-676-0953

Email: [priyeah@uc.edu](mailto:priyeah@uc.edu)

# **Supporting Information**

**Total number of pages: 6**

**Total number of figures: 2**

**Total number of tables: 1**

## Table of Contents

### Contents

|                                                                                                   |   |
|---------------------------------------------------------------------------------------------------|---|
| SFigure 1 Steam-mediated isothermal heating setup.....                                            | 4 |
| STable 1: Primers used in loop-mediated isothermal amplification assays in the current study..... | 5 |
| SFigure 2: Impact of wind and wind shielding on LAMP tube temperatures. ....                      | 6 |

**SFigure 1 Steam-mediated isothermal heating setup.**

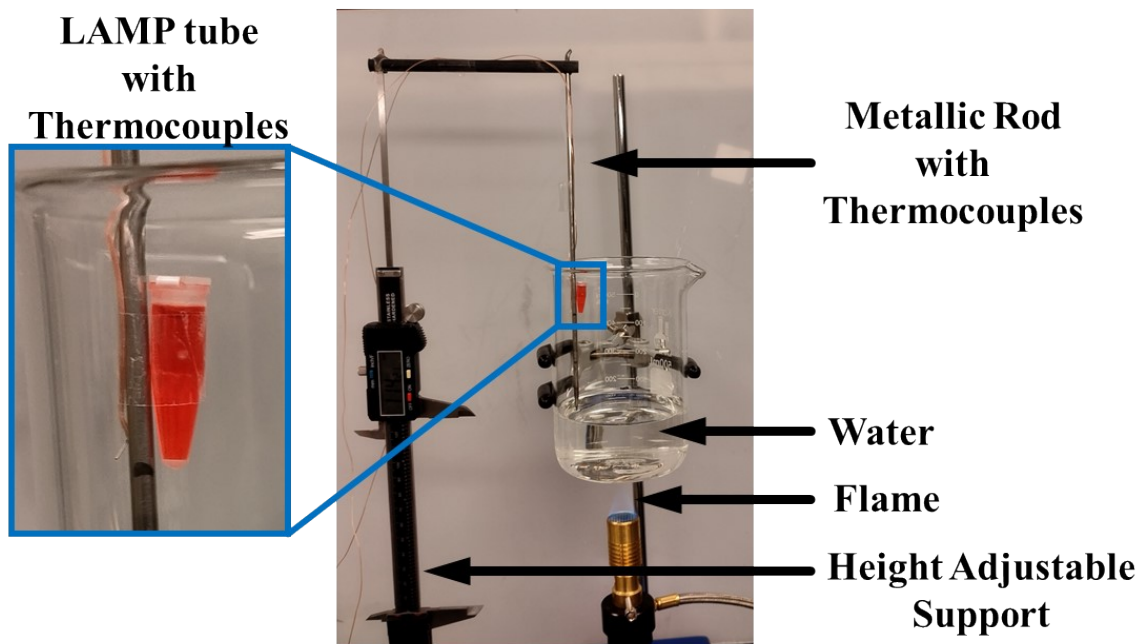

SFigure 1. Steam-mediated isothermal heating setup: A borosilicate glass beaker generates steam by boiling water with a butane gas burner. PCR tubes are suspended in the steam wake region using a height-adjustable stainless-steel holder. Type K thermocouples monitor internal and external temperatures, ensuring precise control for isothermal amplification. The LAMP tube is filled with red coloring dye for visualization purposes.

**STable 1: Primers used in loop-mediated isothermal amplification assays in the current study.**

Target/Type Sequence 5' > 3' *lipL32*

|               |                                           |
|---------------|-------------------------------------------|
| Outer forward | CGCCTGTTGGGGAAATCATAC                     |
| Outer reverse | GCGATTTGGTCAGGCATA                        |
| Inner forward | AGCGTCGCTTACTAAGTCTCCTCGCTGAAATGGGAGTTC   |
| Inner reverse | GCGGCTACCCCAGAAGAAAAACGACATTCTTTCTACACGGA |
| Loop forward  | CGCCTGTTGGGGAAATCATAC                     |
| Loop reverse  | ATGCCACATTGGTTTGATACTTGG                  |

**SFigure 2: Impact of wind and wind shielding on LAMP tube temperatures.**

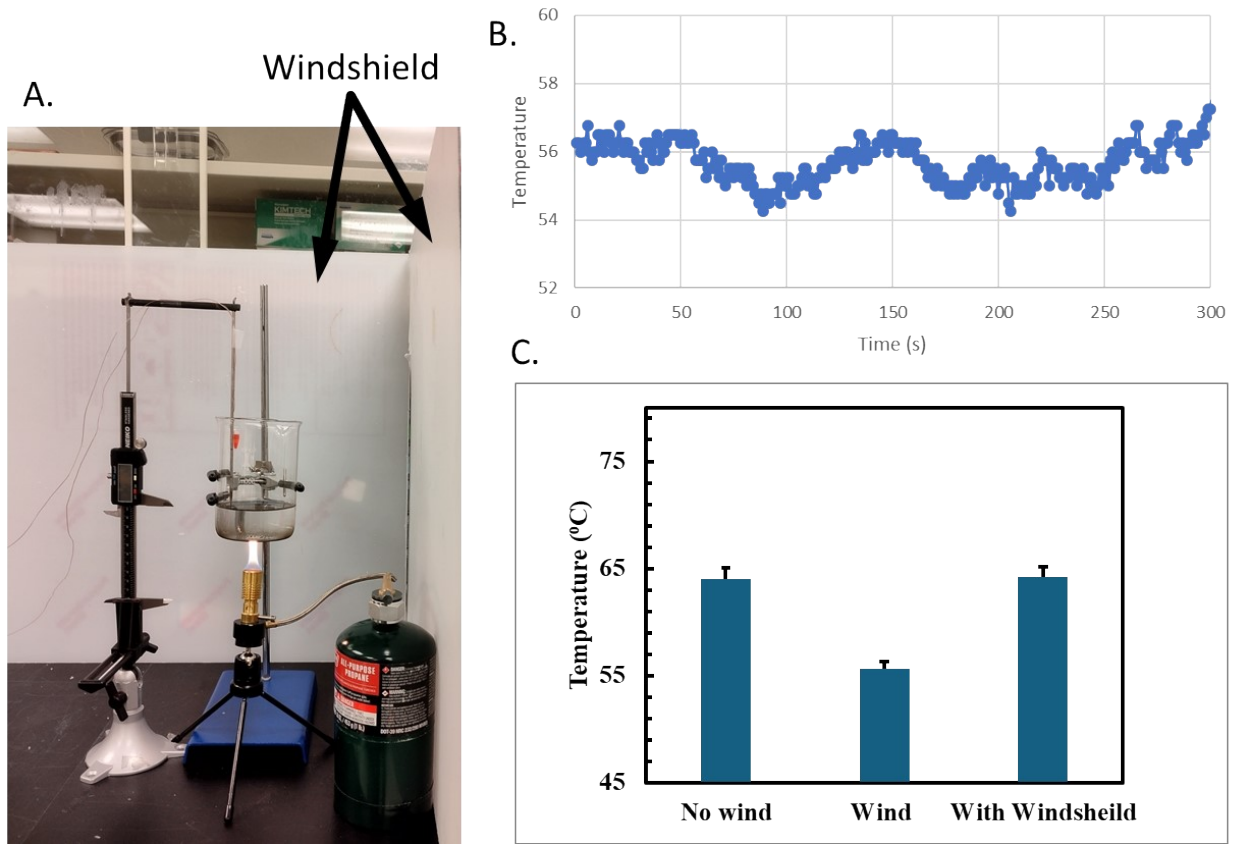

**SFigure 2: Impact of wind and wind shielding on LAMP tube temperatures.** A. Steam heating setup with the windshield. B. Temperature variation inside the LAMP vial with the wind (simulated by a fan). C. Average temperatures within LAMP tubes were measured under three conditions: no wind, simulated ambient wind of ~4 m/s using a table fan, and simulated wind with a windshield in place. The simulated wind caused a significant drop in tube temperatures, while the addition of a windshield restored temperature stability to levels comparable to the no-wind condition, demonstrating the shield's effectiveness in maintaining consistent thermal environments. Bar plots represent the average temperature over a 5-minute period ( $n = 300$ ) with standard deviation as error bars.
